# Supplementary material for: De novo transcriptome sequencing and comprehensive analysis of the drought-responsive genes in the desert plant Cynanchum komarovii
Source: PubMed Central journal article supplement (PMC4594960; doi:10.1186/s12864-015-1873-x), 2015-10-06

# Cluster analysis of differentially expressed genes

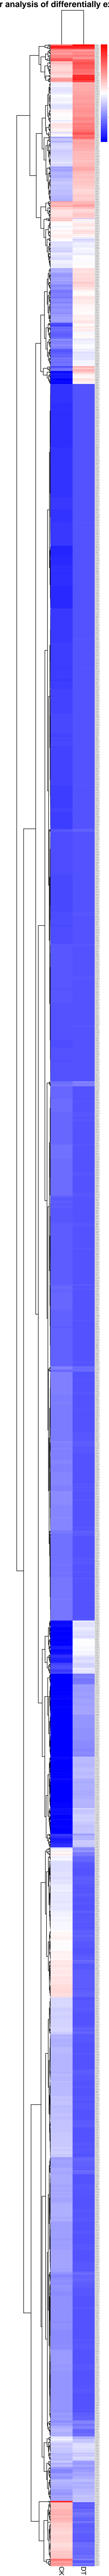

Supplement: 12864_2015_1873_MOESM5_ESM.pdf [file 12864_2015_1873_MOESM5_ESM.pdf]
